# Supplementary material for: Biomass Allocation and Leaf Morphology of Saplings Grown under Various Conditions of Light Availability and Competition Types
Source: MDPI journal article supplement (doi:10.3390/plants11030305), 2022-01-24
Supplement: s1 [file s1]

**Table S1:** Regression coefficients for different quantiles ( $\tau$ ) in the quantile regression and ordinary least squares (OLS) models for Specific Leaf Area (SLA). Standard errors are shown in brackets. Asterisks indicate the p-value (p) group: \*  $p < 0.1$ , \*\*  $p < 0.05$ , \*\*\*  $p < 0.01$ .

|                                         | <i>Dependent variable: Specific Leaf Area (SLA)</i> |                        |                        |                        |                        |                        |
|-----------------------------------------|-----------------------------------------------------|------------------------|------------------------|------------------------|------------------------|------------------------|
|                                         | OLS                                                 | $\tau = 0.1$           | $\tau = 0.3$           | $\tau = 0.5$           | $\tau = 0.7$           | $\tau = 0.9$           |
| Intercept                               | 116.830***<br>(12.321)                              | 96.326***<br>(12.748)  | 112.337***<br>(14.876) | 112.337***<br>(15.173) | 127.338***<br>(10.532) | 127.338***<br>(18.441) |
| European beech                          | 127.917***<br>(12.643)                              | 95.798***<br>(16.719)  | 122.547***<br>(18.013) | 135.596***<br>(15.623) | 134.210***<br>(13.145) | 163.524***<br>(19.232) |
| Norway spruce                           | -14.331<br>(15.697)                                 | -5.860<br>(12.957)     | -14.321<br>(15.630)    | -10.494<br>(15.525)    | -17.876<br>(12.163)    | -12.638<br>(18.804)    |
| Light 20%                               | -22.976*<br>(13.060)                                | -12.331<br>(12.956)    | -24.409<br>(15.103)    | -20.603<br>(15.255)    | -28.336***<br>(10.649) | -25.380<br>(19.690)    |
| Light 50%                               | -37.153***<br>(12.736)                              | -25.885**<br>(12.794)  | -38.770***<br>(14.866) | -35.026**<br>(15.077)  | -42.431***<br>(10.923) | -37.802**<br>(18.655)  |
| Competitor – dissimilar                 | -3.255<br>(7.242)                                   | -4.263*<br>(2.495)     | -1.750<br>(2.924)      | -2.758<br>(3.518)      | -5.570<br>(4.744)      | 0.725<br>(7.248)       |
| European beech: Light 20%               | -68.133***<br>(13.565)                              | -47.429***<br>(17.727) | -60.241***<br>(18.629) | -72.227***<br>(15.632) | -72.877***<br>(13.044) | -96.369***<br>(20.686) |
| Norway spruce: Light 20%                | 16.841<br>(16.594)                                  | 9.611<br>(13.275)      | 18.075<br>(15.831)     | 15.475<br>(15.524)     | 19.196<br>(12.302)     | 16.323<br>(20.086)     |
| European beech: Light 50%               | -68.734***<br>(13.267)                              | -47.251***<br>(16.882) | -67.967***<br>(18.122) | -78.648***<br>(15.572) | -71.702***<br>(13.043) | -98.688***<br>(19.997) |
| Norway spruce: Light 50%                | 19.840<br>(16.122)                                  | 10.300<br>(13.089)     | 21.828<br>(15.658)     | 18.260<br>(15.394)     | 21.970*<br>(12.372)    | 18.629<br>(19.010)     |
| European beech: Competitor – dissimilar | 10.166<br>(7.863)                                   | 7.816<br>(6.329)       | 3.816<br>(5.309)       | 10.241**<br>(4.419)    | 13.224**<br>(5.725)    | 9.132<br>(8.361)       |
| Norway spruce: Competitor – dissimilar  | 1.011<br>(9.065)                                    | 5.559*<br>(2.914)      | 0.709<br>(3.262)       | -0.943<br>(3.996)      | 1.223<br>(5.551)       | -4.234<br>(7.978)      |
| Observations                            | 431                                                 | 431                    | 431                    | 431                    | 431                    | 431                    |

**Table S2:** Regression coefficients for different quantiles ( $\tau$ ) in the quantile regression and ordinary least squares (OLS) models for Leaf Mass Fraction (LMF). Standard errors are shown in brackets. Asterisks indicate the p-value (p) group: \*  $p < 0.1$ , \*\*  $p < 0.05$ , \*\*\*  $p < 0.01$ .

|                                         | <i>Dependent variable: Leaf Mass Fraction (LMF)</i> |                      |                      |                      |                      |                     |
|-----------------------------------------|-----------------------------------------------------|----------------------|----------------------|----------------------|----------------------|---------------------|
|                                         | OLS                                                 | $\tau = 0.1$         | $\tau = 0.3$         | $\tau = 0.5$         | $\tau = 0.7$         | $\tau = 0.9$        |
| Intercept                               | 0.178***<br>(0.004)                                 | 0.143***<br>(0.007)  | 0.166***<br>(0.005)  | 0.177***<br>(0.004)  | 0.190***<br>(0.003)  | 0.211***<br>(0.008) |
| European beech                          | -0.040***<br>(0.006)                                | -0.054***<br>(0.009) | -0.046***<br>(0.006) | -0.041***<br>(0.007) | -0.036***<br>(0.006) | -0.023*<br>(0.013)  |
| Norway spruce                           | 0.035***<br>(0.005)                                 | 0.028***<br>(0.010)  | 0.029***<br>(0.006)  | 0.036***<br>(0.006)  | 0.037***<br>(0.004)  | 0.041***<br>(0.010) |
| Light 20%                               | 0.019***<br>(0.007)                                 | 0.020**<br>(0.010)   | 0.019**<br>(0.008)   | 0.017***<br>(0.007)  | 0.013*<br>(0.007)    | 0.018<br>(0.013)    |
| Light 50%                               | 0.001<br>(0.006)                                    | 0.017**<br>(0.008)   | 0.002<br>(0.006)     | 0.001<br>(0.005)     | -0.006<br>(0.004)    | -0.010<br>(0.010)   |
| Competitor – dissimilar                 | -0.016***<br>(0.006)                                | -0.016<br>(0.012)    | -0.011**<br>(0.005)  | -0.015***<br>(0.005) | -0.015**<br>(0.007)  | -0.011<br>(0.010)   |
| European beech: Light 20%               | 0.047***<br>(0.008)                                 | 0.034***<br>(0.012)  | 0.032**<br>(0.013)   | 0.047***<br>(0.011)  | 0.056***<br>(0.010)  | 0.063***<br>(0.018) |
| Norway spruce: Light 20%                | -0.026***<br>(0.008)                                | -0.014<br>(0.012)    | -0.020**<br>(0.008)  | -0.026***<br>(0.008) | 0.019**<br>(0.008)   | -0.036**<br>(0.014) |
| European beech: Light 50%               | 0.022***<br>(0.008)                                 | 0.014<br>(0.011)     | 0.019*<br>(0.010)    | 0.024***<br>(0.008)  | 0.029***<br>(0.008)  | 0.026<br>(0.016)    |
| Norway spruce: Light 50%                | -0.017**<br>(0.007)                                 | -0.018<br>(0.011)    | -0.012*<br>(0.007)   | -0.017***<br>(0.007) | -0.013**<br>(0.006)  | -0.008<br>(0.012)   |
| European beech: Competitor – dissimilar | 0.018**<br>(0.007)                                  | 0.019<br>(0.013)     | 0.012<br>(0.009)     | 0.018**<br>(0.008)   | 0.016<br>(0.010)     | 0.005<br>(0.014)    |
| Norway spruce: Competitor – dissimilar  | 0.022***<br>(0.007)                                 | 0.029**<br>(0.013)   | 0.021***<br>(0.007)  | 0.021***<br>(0.006)  | 0.016*<br>(0.009)    | 0.008<br>(0.013)    |
| Observations                            | 773                                                 | 773                  | 773                  | 773                  | 773                  | 773                 |

**Table S3:** Regression coefficients for different quantiles ( $\tau$ ) in the quantile regression and ordinary least squares (OLS) models for woody Aboveground Mass Fraction (AMF). Standard errors are shown in brackets. Asterisks indicate the p-value (p) group: \* p < 0.1, \*\* p < 0.05, \*\*\* p < 0.01.

|                                         | <i>Dependent variable: Woody Aboveground Mass Fraction (AMF)</i> |                      |                      |                      |                      |                      |
|-----------------------------------------|------------------------------------------------------------------|----------------------|----------------------|----------------------|----------------------|----------------------|
|                                         | OLS                                                              | $\tau = 0.1$         | $\tau = 0.3$         | $\tau = 0.5$         | $\tau = 0.7$         | $\tau = 0.9$         |
| Intercept                               | 0.630***<br>(0.006)                                              | 0.605***<br>(0.015)  | 0.621***<br>(0.005)  | 0.631***<br>(0.006)  | 0.647***<br>(0.005)  | 0.661***<br>(0.004)  |
| European beech                          | -0.205***<br>(0.007)                                             | -0.242***<br>(0.015) | -0.223***<br>(0.010) | -0.202***<br>(0.011) | -0.197***<br>(0.010) | -0.174***<br>(0.012) |
| Norway spruce                           | -0.041***<br>(0.007)                                             | -0.048***<br>(0.016) | -0.041***<br>(0.005) | -0.040***<br>(0.006) | -0.044***<br>(0.006) | -0.037***<br>(0.006) |
| Light 20%                               | -0.018**<br>(0.008)                                              | -0.030<br>(0.022)    | -0.026***<br>(0.007) | -0.020**<br>(0.009)  | -0.016**<br>(0.006)  | -0.009<br>(0.011)    |
| Light 50%                               | -0.035***<br>(0.006)                                             | -0.050***<br>(0.008) | -0.043***<br>(0.006) | -0.035***<br>(0.005) | -0.033***<br>(0.004) | -0.027***<br>(0.010) |
| Competitor – dissimilar                 | -0.004<br>(0.008)                                                | -0.035<br>(0.023)    | -0.004<br>(0.010)    | -0.003<br>(0.007)    | -0.001<br>(0.007)    | -0.006<br>(0.012)    |
| European beech: Light 20%               | 0.009<br>(0.011)                                                 | 0.008<br>(0.023)     | 0.011<br>(0.012)     | 0.008<br>(0.014)     | 0.010<br>(0.014)     | 0.010<br>(0.021)     |
| Norway spruce: Light 20%                | 0.008<br>(0.010)                                                 | 0.018<br>(0.024)     | 0.013*<br>(0.008)    | 0.005<br>(0.010)     | 0.005<br>(0.008)     | -0.001<br>(0.014)    |
| European beech: Light 50%               | 0.010<br>(0.010)                                                 | 0.034<br>(0.022)     | 0.009<br>(0.012)     | -0.001<br>(0.013)    | 0.014<br>(0.020)     | 0.013<br>(0.019)     |
| Norway spruce: Light 50%                | 0.008<br>(0.009)                                                 | 0.011<br>(0.020)     | 0.013<br>(0.009)     | 0.004<br>(0.008)     | 0.005<br>(0.009)     | 0.004<br>(0.013)     |
| European beech: Competitor – dissimilar | 0.017*<br>(0.010)                                                | 0.041<br>(0.025)     | 0.019<br>(0.014)     | 0.004<br>(0.012)     | 0.021<br>(0.016)     | 0.031<br>(0.020)     |
| Norway spruce: Competitor – dissimilar  | 0.008<br>(0.010)                                                 | 0.027<br>(0.025)     | 0.009<br>(0.010)     | 0.002<br>(0.009)     | 0.004<br>(0.007)     | 0.0001<br>(0.015)    |
| Observations                            | 761                                                              | 761                  | 761                  | 761                  | 761                  | 761                  |

**Table S4:** Regression coefficients for different quantiles ( $\tau$ ) in the quantile regression and ordinary least squares (OLS) models for Root Mass Fraction (RMF). Standard errors are shown in brackets. Asterisks indicate the p-value (p) group: \* p < 0.1, \*\* p < 0.05, \*\*\* p < 0.01.

|                                         | <i>Dependent variable: Root Mass Fraction (RMF)</i> |                     |                      |                      |                      |                      |
|-----------------------------------------|-----------------------------------------------------|---------------------|----------------------|----------------------|----------------------|----------------------|
|                                         | OLS                                                 | $\tau = 0.1$        | $\tau = 0.3$         | $\tau = 0.5$         | $\tau = 0.7$         | $\tau = 0.9$         |
| Intercept                               | 0.194***<br>(0.006)                                 | 0.155***<br>(0.006) | 0.170***<br>(0.008)  | 0.198***<br>(0.006)  | 0.214***<br>(0.004)  | 0.233***<br>(0.010)  |
| European beech                          | 0.244***<br>(0.009)                                 | 0.221***<br>(0.012) | 0.242***<br>(0.011)  | 0.243***<br>(0.011)  | 0.262***<br>(0.009)  | 0.287***<br>(0.015)  |
| Norway spruce                           | 0.005<br>(0.008)                                    | -0.004<br>(0.009)   | 0.010<br>(0.009)     | -0.0002<br>(0.007)   | 0.005<br>(0.006)     | 0.007<br>(0.013)     |
| Light 20%                               | -0.0004<br>(0.010)                                  | -0.014<br>(0.014)   | 0.012<br>(0.012)     | -0.001<br>(0.008)    | -0.003<br>(0.007)    | -0.001<br>(0.016)    |
| Light 50%                               | 0.039***<br>(0.008)                                 | 0.024***<br>(0.009) | 0.036***<br>(0.010)  | 0.034***<br>(0.010)  | 0.038***<br>(0.007)  | 0.040***<br>(0.013)  |
| Competitor – dissimilar                 | 0.015*<br>(0.009)                                   | 0.016<br>(0.011)    | 0.020*<br>(0.010)    | 0.014*<br>(0.008)    | 0.010<br>(0.011)     | 0.030<br>(0.020)     |
| European beech: Light 20%               | -0.054***<br>(0.012)                                | -0.043<br>(0.030)   | -0.060***<br>(0.016) | -0.053***<br>(0.015) | -0.059***<br>(0.012) | -0.061***<br>(0.021) |
| Norway spruce: Light 20%                | 0.017<br>(0.012)                                    | 0.033**<br>(0.016)  | 0.009<br>(0.014)     | 0.019**<br>(0.010)   | 0.014<br>(0.010)     | 0.015<br>(0.018)     |
| European beech: Light 50%               | -0.031***<br>(0.010)                                | -0.017<br>(0.022)   | -0.024<br>(0.012)    | -0.029*<br>(0.013)   | -0.039***<br>(0.020) | -0.021<br>(0.019)    |
| Norway spruce: Light 50%                | 0.004<br>(0.011)                                    | 0.026*<br>(0.014)   | 0.004<br>(0.012)     | 0.007<br>(0.011)     | 0.003<br>(0.010)     | 0.017<br>(0.018)     |
| European beech: Competitor – dissimilar | -0.030***<br>(0.011)                                | -0.052**<br>(0.021) | -0.039***<br>(0.015) | -0.033***<br>(0.012) | -0.022*<br>(0.013)   | -0.038<br>(0.024)    |
| Norway spruce: Competitor – dissimilar  | -0.022**<br>(0.011)                                 | -0.023<br>(0.015)   | -0.023*<br>(0.012)   | -0.018*<br>(0.010)   | -0.017<br>(0.012)    | -0.038*<br>(0.022)   |
| Observations                            | 773                                                 | 773                 | 773                  | 773                  | 773                  | 773                  |

**Table S5:** Regression coefficients for different quantiles ( $\tau$ ) in the quantile regression and ordinary least squares (OLS) models for Leaf Mass Fraction (LMF) including height and diameter variables. Standard errors are shown in brackets. Asterisks indicate the p-value (p) group: \* p < 0.1, \*\* p < 0.05, \*\*\* p < 0.01.

|                                         | <i>Dependent variable: Leaf Mass Fraction (LMF)</i> |                            |                             |                               |                              |                              |
|-----------------------------------------|-----------------------------------------------------|----------------------------|-----------------------------|-------------------------------|------------------------------|------------------------------|
|                                         | OLS                                                 | $\tau = 0.1$               | $\tau = 0.3$                | $\tau = 0.5$                  | $\tau = 0.7$                 | $\tau = 0.9$                 |
| Intercept                               | 0.186***<br>(0.006)                                 | 0.142***<br>(0.008)        | 0.172***<br>(0.007)         | 0.190***<br>(0.006)           | 0.201***<br>(0.006)          | 0.229***<br>(0.009)          |
| European beech                          | -0.040***<br>(0.006)                                | -0.053***<br>(0.009)       | -0.046***<br>(0.007)        | -0.042***<br>(0.007)          | -0.034***<br>(0.006)         | -0.027**<br>(0.011)          |
| Norway spruce                           | 0.032***<br>(0.006)                                 | 0.028***<br>(0.010)        | 0.026***<br>(0.006)         | 0.029***<br>(0.005)           | 0.034***<br>(0.005)          | 0.032***<br>(0.009)          |
| Light 20%                               | 0.023***<br>(0.007)                                 | 0.020**<br>(0.009)         | 0.022**<br>(0.008)          | 0.022***<br>(0.006)           | 0.020***<br>(0.007)          | 0.021*<br>(0.011)            |
| Light 50%                               | 0.009<br>(0.008)                                    | 0.013<br>(0.011)           | 0.008<br>(0.009)            | 0.002<br>(0.005)              | 0.005<br>(0.007)             | 0.004<br>(0.013)             |
| Competitor – dissimilar                 | -0.015**<br>(0.006)                                 | -0.016<br>(0.012)          | -0.015***<br>(0.005)        | -0.012**<br>(0.005)           | -0.011*<br>(0.006)           | -0.012<br>(0.009)            |
| <b>Height (cm)</b>                      | <b>-0.0002*</b><br>(0.0001)                         | <b>-0.0001</b><br>(0.0001) | <b>-0.0002*</b><br>(0.0001) | <b>-0.0003***</b><br>(0.0001) | <b>-0.0002**</b><br>(0.0001) | <b>-0.0004**</b><br>(0.0002) |
| <b>Diameter (mm)</b>                    | <b>0.0001</b><br>(0.001)                            | <b>0.001</b><br>(0.001)    | <b>0.001</b><br>(0.001)     | <b>0.001*</b><br>(0.001)      | <b>0.00002</b><br>(0.001)    | <b>0.0003</b><br>(0.001)     |
| European beech: Light 20%               | 0.047***<br>(0.008)                                 | 0.034***<br>(0.012)        | 0.032**<br>(0.013)          | 0.047***<br>(0.011)           | 0.056***<br>(0.010)          | 0.063***<br>(0.018)          |
| Norway spruce: Light 20%                | -0.026***<br>(0.008)                                | -0.014<br>(0.012)          | -0.020**<br>(0.008)         | -0.026***<br>(0.008)          | 0.019**<br>(0.008)           | -0.036**<br>(0.014)          |
| European beech: Light 50%               | 0.022***<br>(0.008)                                 | 0.014<br>(0.011)           | 0.019*<br>(0.010)           | 0.024***<br>(0.008)           | 0.029***<br>(0.008)          | 0.026<br>(0.016)             |
| Norway spruce: Light 50%                | -0.017**<br>(0.007)                                 | -0.018<br>(0.011)          | -0.012*<br>(0.007)          | -0.017***<br>(0.007)          | -0.013**<br>(0.006)          | -0.008<br>(0.012)            |
| European beech: Competitor – dissimilar | 0.018**<br>(0.007)                                  | 0.019<br>(0.013)           | 0.012<br>(0.009)            | 0.018**<br>(0.008)            | 0.016<br>(0.010)             | 0.005<br>(0.014)             |
| Norway spruce: Competitor – dissimilar  | 0.022***<br>(0.007)                                 | 0.029**<br>(0.013)         | 0.021***<br>(0.007)         | 0.021***<br>(0.006)           | 0.016*<br>(0.009)            | 0.008<br>(0.013)             |
| Observations                            | 773                                                 | 773                        | 773                         | 773                           | 773                          | 773                          |

**Table S6:** Regression coefficients for different quantiles ( $\tau$ ) in the quantile regression and ordinary least squares (OLS) models for woody Aboveground Mass Fraction (AMF) including height and diameter variables. Standard errors are shown in brackets. Asterisks indicate the p-value (p) group: \* p < 0.1, \*\* p < 0.05, \*\*\* p < 0.01.

|                                         | <i>Dependent variable: Woody Aboveground Mass Fraction (AMF)</i> |                              |                              |                              |                              |                              |
|-----------------------------------------|------------------------------------------------------------------|------------------------------|------------------------------|------------------------------|------------------------------|------------------------------|
|                                         | OLS                                                              | $\tau = 0.1$                 | $\tau = 0.3$                 | $\tau = 0.5$                 | $\tau = 0.7$                 | $\tau = 0.9$                 |
| Intercept                               | 0.588***<br>(0.007)                                              | 0.553***<br>(0.012)          | 0.573***<br>(0.007)          | 0.590***<br>(0.007)          | 0.611***<br>(0.009)          | 0.634***<br>(0.010)          |
| European beech                          | -0.206***<br>(0.007)                                             | -0.235***<br>(0.009)         | -0.218***<br>(0.007)         | -0.206***<br>(0.008)         | -0.209***<br>(0.009)         | -0.187***<br>(0.013)         |
| Norway spruce                           | -0.023***<br>(0.007)                                             | -0.016<br>(0.011)            | -0.019***<br>(0.005)         | -0.021***<br>(0.006)         | -0.029***<br>(0.007)         | -0.026***<br>(0.009)         |
| Light 20%                               | -0.038***<br>(0.008)                                             | -0.047***<br>(0.011)         | -0.042***<br>(0.007)         | -0.032***<br>(0.011)         | -0.032***<br>(0.008)         | -0.020*<br>(0.011)           |
| Light 50%                               | -0.064***<br>(0.009)                                             | -0.078***<br>(0.019)         | -0.069***<br>(0.010)         | -0.061***<br>(0.011)         | -0.054***<br>(0.012)         | -0.046***<br>(0.014)         |
| Competitor – dissimilar                 | -0.008<br>(0.007)                                                | -0.032*<br>(0.019)           | -0.008<br>(0.006)            | -0.009<br>(0.009)            | -0.002<br>(0.007)            | -0.009<br>(0.009)            |
| <b>Height (cm)</b>                      | <b>0.001***<br/>(0.0001)</b>                                     | <b>0.001***<br/>(0.0002)</b> | <b>0.001***<br/>(0.0002)</b> | <b>0.001***<br/>(0.0002)</b> | <b>0.001***<br/>(0.0002)</b> | <b>0.001***<br/>(0.0002)</b> |
| <b>Diameter (mm)</b>                    | <b>-0.003***<br/>(0.001)</b>                                     | <b>-0.005***<br/>(0.002)</b> | <b>-0.002*<br/>(0.001)</b>   | <b>-0.004***<br/>(0.001)</b> | <b>-0.003***<br/>(0.001)</b> | <b>-0.002<br/>(0.002)</b>    |
| European beech: Light 20%               | 0.024**<br>(0.010)                                               | 0.037***<br>(0.014)          | 0.024**<br>(0.012)           | 0.018<br>(0.014)             | 0.028**<br>(0.012)           | 0.012<br>(0.019)             |
| Norway spruce: Light 20%                | 0.024**<br>(0.010)                                               | 0.031**<br>(0.012)           | 0.023***<br>(0.008)          | 0.015<br>(0.012)             | 0.021**<br>(0.008)           | 0.004<br>(0.015)             |
| European beech: Light 50%               | 0.023**<br>(0.010)                                               | 0.032*<br>(0.018)            | 0.024**<br>(0.012)           | 0.011<br>(0.013)             | 0.024<br>(0.017)             | 0.016<br>(0.019)             |
| Norway spruce: Light 50%                | 0.027***<br>(0.009)                                              | 0.025<br>(0.018)             | 0.022***<br>(0.008)          | 0.028***<br>(0.010)          | 0.022**<br>(0.010)           | 0.020<br>(0.014)             |
| European beech: Competitor – dissimilar | 0.012<br>(0.009)                                                 | 0.036<br>(0.022)             | 0.014<br>(0.009)             | 0.009<br>(0.011)             | 0.016<br>(0.011)             | 0.032**<br>(0.016)           |
| Norway spruce: Competitor – dissimilar  | 0.009<br>(0.009)                                                 | 0.033<br>(0.021)             | 0.011<br>(0.008)             | 0.009<br>(0.010)             | 0.002<br>(0.008)             | 0.005<br>(0.012)             |
| Observations                            | 761                                                              | 761                          | 761                          | 761                          | 761                          | 761                          |

**Table S7:** Regression coefficients for different quantiles ( $\tau$ ) in the quantile regression and ordinary least squares (OLS) models for Root Mass Fraction (RMF) including height and diameter variables. Standard errors are shown in brackets. Asterisks indicate the p-value (p) group: \* p < 0.1, \*\* p < 0.05, \*\*\* p < 0.01.

|                                         | <i>Dependent variable: Root Mass Fraction (RMF)</i> |                               |                               |                               |                               |                               |
|-----------------------------------------|-----------------------------------------------------|-------------------------------|-------------------------------|-------------------------------|-------------------------------|-------------------------------|
|                                         | OLS                                                 | $\tau = 0.1$                  | $\tau = 0.3$                  | $\tau = 0.5$                  | $\tau = 0.7$                  | $\tau = 0.9$                  |
| Intercept                               | 0.230***<br>(0.008)                                 | 0.179***<br>(0.011)           | 0.193***<br>(0.012)           | 0.229***<br>(0.010)           | 0.241***<br>(0.008)           | 0.275***<br>(0.013)           |
| European beech                          | 0.245***<br>(0.008)                                 | 0.222***<br>(0.013)           | 0.242***<br>(0.010)           | 0.237***<br>(0.012)           | 0.264***<br>(0.008)           | 0.284***<br>(0.015)           |
| Norway spruce                           | -0.011<br>(0.008)                                   | -0.012<br>(0.011)             | 0.001<br>(0.010)              | -0.017**<br>(0.009)           | -0.008<br>(0.005)             | -0.011<br>(0.011)             |
| Light 20%                               | 0.016*<br>(0.010)                                   | 0.003<br>(0.013)              | 0.012<br>(0.013)              | 0.011<br>(0.009)              | 0.009<br>(0.009)              | 0.032**<br>(0.014)            |
| Light 50%                               | 0.061***<br>(0.011)                                 | 0.036**<br>(0.017)            | 0.046***<br>(0.012)           | 0.052***<br>(0.013)           | 0.056***<br>(0.012)           | 0.071***<br>(0.023)           |
| Competitor – dissimilar                 | 0.018**<br>(0.009)                                  | 0.016<br>(0.011)              | 0.022**<br>(0.010)            | 0.010<br>(0.009)              | 0.018**<br>(0.008)            | 0.023<br>(0.015)              |
| <b>Height (cm)</b>                      | <b>-0.001***<br/>(0.0001)</b>                       | <b>-0.001***<br/>(0.0003)</b> | <b>-0.001***<br/>(0.0002)</b> | <b>-0.001***<br/>(0.0002)</b> | <b>-0.001***<br/>(0.0002)</b> | <b>-0.001***<br/>(0.0002)</b> |
| <b>Diameter (mm)</b>                    | <b>0.003***<br/>(0.001)</b>                         | <b>0.003<br/>(0.002)</b>      | <b>0.003*<br/>(0.001)</b>     | <b>0.003**<br/>(0.001)</b>    | <b>0.003*<br/>(0.001)</b>     | <b>0.005***<br/>(0.002)</b>   |
| European beech: Light 20%               | -0.067***<br>(0.012)                                | -0.064***<br>(0.023)          | -0.054***<br>(0.017)          | -0.056***<br>(0.014)          | -0.064***<br>(0.014)          | -0.088***<br>(0.020)          |
| Norway spruce: Light 20%                | 0.003<br>(0.011)                                    | 0.012<br>(0.016)              | 0.007<br>(0.014)              | 0.009<br>(0.011)              | 0.010<br>(0.010)              | -0.013<br>(0.015)             |
| European beech: Light 50%               | -0.041***<br>(0.012)                                | -0.025<br>(0.019)             | -0.027<br>(0.016)             | -0.035**<br>(0.015)           | -0.048***<br>(0.017)          | -0.039<br>(0.028)             |
| Norway spruce: Light 50%                | -0.011<br>(0.011)                                   | -0.014<br>(0.016)             | -0.007<br>(0.012)             | -0.009<br>(0.011)             | -0.004<br>(0.011)             | -0.010<br>(0.017)             |
| European beech: Competitor – dissimilar | -0.025**<br>(0.011)                                 | -0.041**<br>(0.016)           | -0.040***<br>(0.014)          | -0.022*<br>(0.012)            | -0.029**<br>(0.014)           | -0.027<br>(0.021)             |
| Norway spruce: Competitor – dissimilar  | -0.023**<br>(0.010)                                 | -0.027*<br>(0.016)            | -0.023**<br>(0.011)           | -0.010<br>(0.009)             | -0.026***<br>(0.009)          | -0.036**<br>(0.017)           |
| Observations                            | 773                                                 | 773                           | 773                           | 773                           | 773                           | 773                           |

**Table S8.** Number of replicates per species and light level used to analyze leaf morphology and biomass allocation. SLA – specific leaf area, LMF – leaf mass fraction, AMF – woody aboveground mass fraction, RMF – root mass fraction.

| Species        | Light | SLA | LMF | AMF | RMF |
|----------------|-------|-----|-----|-----|-----|
| Douglas fir    | 10%   | 4   | 60  | 58  | 60  |
| Douglas fir    | 20%   | 27  | 45  | 45  | 45  |
| Douglas fir    | 50%   | 45  | 72  | 71  | 72  |
| European beech | 10%   | 99  | 103 | 101 | 103 |
| European beech | 20%   | 80  | 79  | 77  | 79  |
| European beech | 50%   | 76  | 74  | 71  | 74  |
| Norway spruce  | 10%   | 7   | 132 | 130 | 132 |
| Norway spruce  | 20%   | 35  | 102 | 102 | 102 |
| Norway spruce  | 50%   | 58  | 106 | 106 | 106 |

**Supplement S9.** The interpretation of quantile regression coefficients based on Tables S1-S7.

In the paper, we state that “Under a 10% light availability level and similar competitor, Norway spruce allocated the most biomass to LMF (21%) compared to Douglas fir (18%) and European beech (14%).” We use this statement as an example to explain how regression coefficients can be interpreted, given the regression tables S1-S7 provided in the supplements.

The base model represents Douglas fir, under 10% light availability and similar competitor.

Consider Table S2:

- The effect of Douglas fir on the median of LMF ( $\tau = 0.5$ ) corresponds to  $100 \cdot 0.177 \approx 18\%$ , where 0.177 is the coefficient of the intercept.
- The effect of Norway spruce on the median of LMF ( $\tau = 0.5$ ) corresponds to  $100 \cdot (0.177 + 0.036) \approx 21\%$ , where 0.177 is the coefficient of the intercept and 0.036 is the coefficient of Norway spruce.
- The effect of European beech on the median of LMF ( $\tau = 0.5$ ) corresponds to  $100 \cdot (0.177 - 0.041) \approx 14\%$ , where 0.177 is the coefficient of the intercept and  $-0.041$  is the coefficient of European beech.
